# Supplementary material
Source: PubMed Central journal article supplement (PMC7029117)
Supplement: supp_AC119.011795_156966_1_supp_455216_q3ss0z.pdf [file supp_AC119.011795_156966_1_supp_455216_q3ss0z.pdf]

**Supplementary Table S1.**  
Real time Q-PCR primer sequences

| <b>Gene</b> | <b>Forward 5'-&gt;3'</b>       | <b>Reverse 5'-&gt;3'</b>       |
|-------------|--------------------------------|--------------------------------|
| Adipoq      | GAT GGC ACT CCT GGA GAG AA     | TCT CCA GGC TCT CCT TTC CT     |
| Ccr7        | AAA GCA CAG CCT TCC TGT GT     | AGT CCA CCG TGG TAT TCT CG     |
| CD137       | CGT GCA GAA CTC CTG TGA TAA C  | GTC CAC CTA TGC TGG AGA AGG    |
| CD137L      | TGC CCC AAC ACT ACA CAA C      | TCT TCG TAC CTC AGA CCT TGA    |
| CD206       | CTC TGT TCA GCT ATT GGA CGC    | TGG CAC TCC CAA ACA TAA TTT GA |
| CD301       | CTCTGGAGAGCACAGTGGAG           | ACTCCGAGCCGTTGTTCT             |
| Cidea       | TGC TCT TCT GTA TCG CCC AGT    | GCC GTG TTA AGG AAT CTG CTG    |
| Cox8b       | TGT GGG GAT CTC AGC CAT AGT    | AGT GGG CTA AGA CCC ATC CTG    |
| Dio2        | CAG TGT GGT GCA CGT CTC CAA TC | TGA ACC AAA GTT GAC CAC CAG    |
| Pgc1a       | AGC CGT GAC CAC TGA CAA CGA G  | GCT GCA TGG TTC TGA GTG CTA AG |
| Tbp         | ACC CTT CAC CAA TGA CTC CTA TG | TGA CTG CAG CAA ATC GCT TGG    |
| Tfam        | GGA ATG TGG AGC GTG CTA AAA    | ACA AGA CTG ATA GAC GAG GGG    |
| Ucp1        | GCA TTC AGA GGC AAA TCA GC     | GCC ACA CCT CCA GTC ATT AAG    |

**Supplementary Table S2**

Details of primary antibodies used for immunoblot and immunohistochemistry

| <b>Antibody</b>                            | <b>Company</b> | <b>Cat no.</b> | <b>Dilution</b> |       |
|--------------------------------------------|----------------|----------------|-----------------|-------|
|                                            |                |                | Immunoblot      | IHC   |
| Rabbit anti-mouse Ucp1 monoclonal antibody | Cell Signaling | 14670          | 1:1000          | 1:70  |
| Goat anti-mouse CD137 antibody             | R&D system     | BAF937         | 1:4000          |       |
| Rat anti-mouse CD137L monoclonal antibody  | Abcam          | ab86575        | 1:1000          |       |
| Rabbit anti-mouse Gapdh antibody           | Sigma-Aldrich  | PLA0125        | 1:6000          |       |
| Anti-rabbit IgG HRP-linked antibody        | Cell Signaling | 7074           | 1:2000          |       |
| Anti-goat IgG HRP-linked antibody          | Abcam          | ab7125         | 1:10000         |       |
| Elite ABC HRP kit                          | Vectastain     | PK-6101        |                 | 1:200 |
| Alexa 555 Tyramide SuperBoost Kit          | Invitrogen     | B40923         |                 |       |
